# Supplementary material
Source: PubMed Central journal article supplement (PMC3696787)
Supplement: 1301647110_pnas.201301647SI.pdf [file 1301647110_pnas.201301647SI.pdf]

# Supporting Information

Vaistij et al. 10.1073/pnas.1301647110

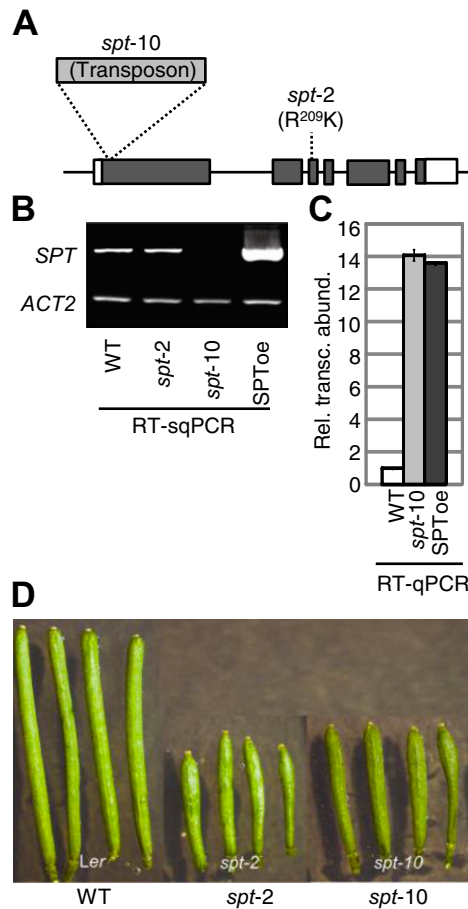

**Fig. S1.** Characterization of the Landsberg erecta (*Ler*) *spt-10* mutant. (A) Schematic representation of the *SPATULA* (*SPT*) locus and the *spt-10* and *spt-2* alleles: dark gray rectangles, *SPT* exons; white rectangles, predicted 5' and 3' UTRs; light gray rectangle, *spt-10* transposon insertion 290 nucleotides downstream of the ATG start of translation, and location of the point mutation leading to the R<sup>209</sup>K amino acid substitution in *spt-2* is indicated. (B) Transcript abundance assessed by reverse-transcription followed by semiquantitative PCR (sqPCR) using primers designed to amplify the full-length *SPT* transcript [oligo sequences: SPT-For GCGACGCGTAATTACTACTACCATGATATCAGAGAGAAGAA and SPT-Rev GCGGGGCCAGTAATTCGATCTTTAGGT; RNA samples collected 2-d after imbibition (2-DAI)]. (C) RT-quantitative PCR (qPCR) determination of transcript abundance using primers specific for the *SPT* 3' region (oligo sequences: qSPT-For CCTTACTTCACCCGTGGAGATG and qSPT-Rev GCGTTGGAATGACCAATGTTC; RNA samples collected 10-DAI). Error bars represent standard error (SE). (D) Picture of siliques from WT, *spt-2*, and *spt-10* showing the typical abnormal silique phenotype of *spt* loss-of-function mutants. We first reported that *spt-10* was acting as a loss-of-function mutant based on the fact that it lacked the full-length *SPT* transcript (B) and exhibited the abnormal fruit development phenotype of other *spt* loss-of-function mutants (D). However, we now revise this description of the *spt-10* phenotype in terms of seed germination on the basis that (i) the mutant phenotype is similar to that of *SPT* overexpressing (*SPToe*)-*Ler* line in that it shows significantly reduced seed dormancy and is opposite to that of the *spt-2* and *Ler* retrogressed *spt-12* germination phenotypes (1) (see also Fig. 1 A and B) and (ii) *spt-10* overaccumulates a truncated transcript (C). These results are consistent with *SPT* acting as a promoter rather than, as previously reported, a repressor of germination and *GA3OX1* and *GA3OX2* expression in *Ler* (1). The fact that *spt-10* acts as a loss-of-function mutant in terms of fruit development suggests that the *SPT* N-terminal region is necessary for its fruit-related but not germination-related function.

1. Penfield S, et al. (2005) Cold and light control seed germination through the bHLH transcription factor *SPATULA*. *Curr Biol* 15(22):1998–2006.

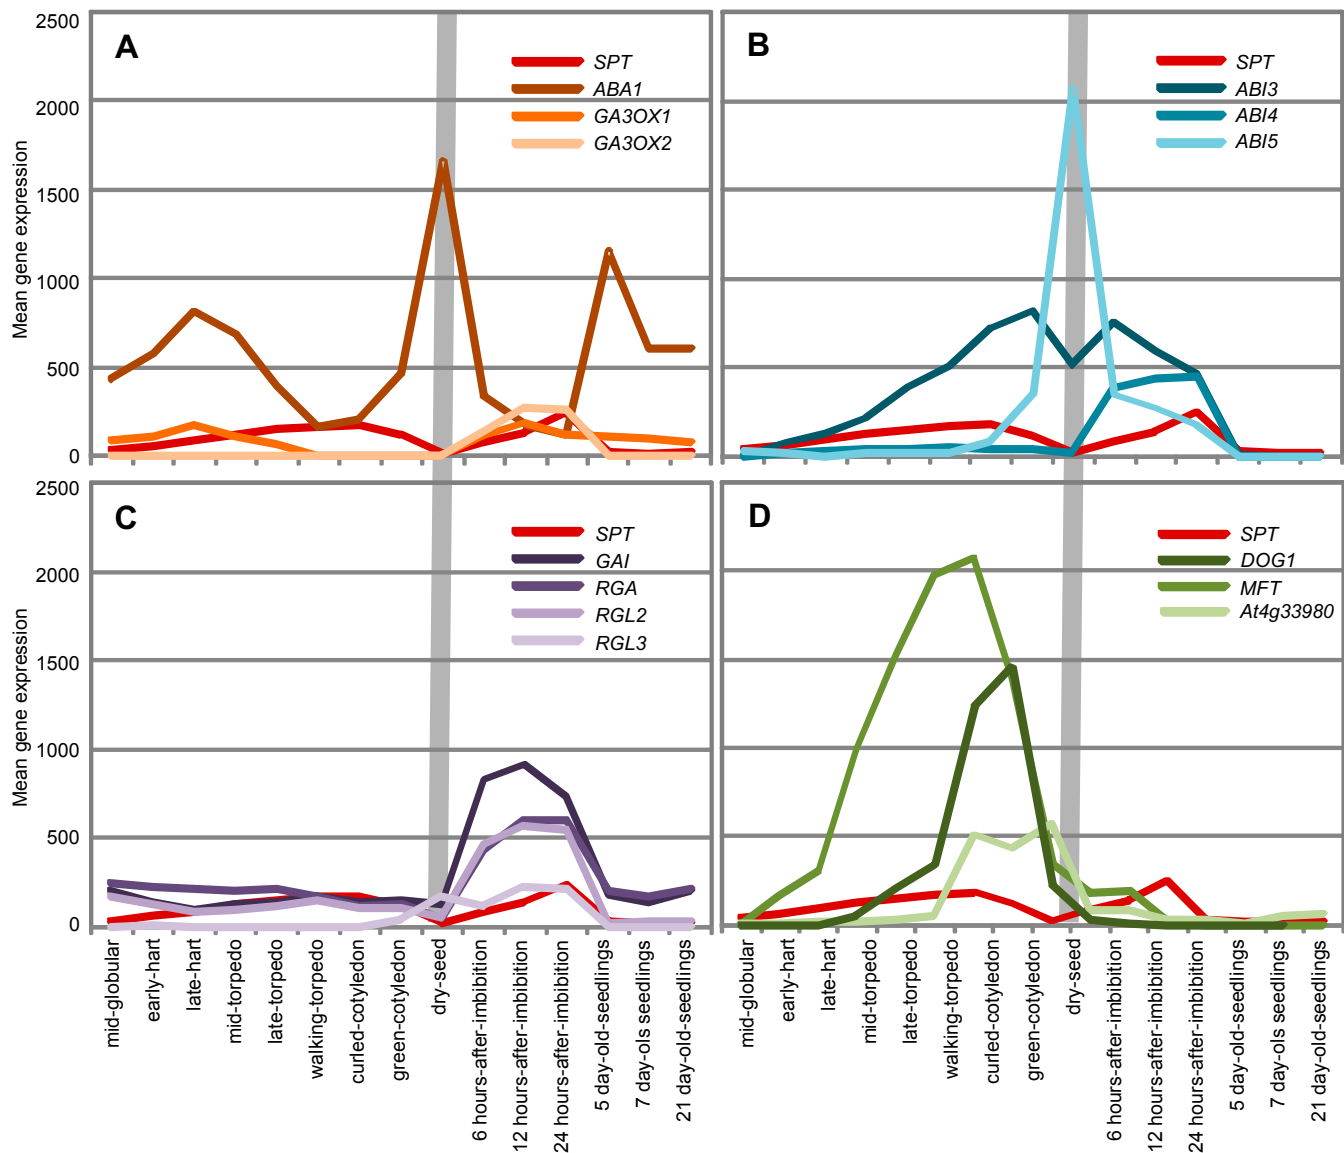

**Fig. S2.** Expression of *SPT*, selected genes involved in abscisic acid (ABA) and gibberellic acid (GA) biosynthesis [*ABA1*, *GA-3-OXIDASE1* (*GA3OX1*), and *GA3OX2*] and signaling [*ABA-INSENSITIVE3* (*ABI3*), *ABI4*, *ABI5*, *GA-INSENSITIVE* (*GAI*), *REPRESSOR-OF-GA* (*RGA*), *RGA-LIKE2* (*RGL2*), and *RGL3*], *DELAY-OF-GERMINATION* (*DOG1*), and *MOTHER-OF-FLOWERING-LOCUS-AND-TERMINAL-FLOWER1* (*MFT*) and *At4g33980* during seed development and early seedling stages (for clarity, the profiles are shown in four different panels, A–D). The data have been derived from publicly available resources. The vertical thick gray line marks the dry-seed stage.

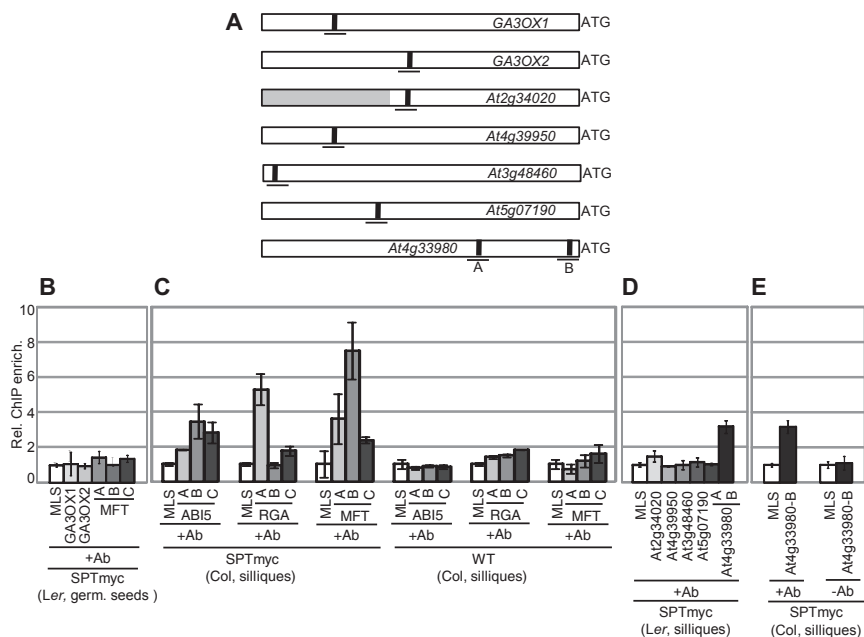

**Fig. S3.** Analyses of SPT interaction with the promoter regions of putative primary targets. (A) Schematic representation of the 2,500-bp region upstream of the ATG start codon of *GA3OX1* and *GA3OX2* and genes harboring G-box motifs listed in Table S2 (apart from *MFT*): Vertical thick black bars represent G-box motifs; light gray rectangle represents the presence of an upstream gene; horizontal thin black lines represent regions assessed for SPT binding. ChIP-qPCR assays were performed on germinating seeds (B), or siliques (C–E). The ecotype (Ler or Col) and the genetic background (SPTmyc or WT) of the biological material are indicated below panels. Assays were performed with (+Ab) or without (–Ab) anti-MYC also as indicated. Amplicons assessed for enrichment are described in A and Figs. 2 and 3. Error bars represent SE.

**Table S1. Amounts of ABA and GA (ng/g DW) in freshly matured DS, 1- and 2-DAI**

| ABA or GA  | Fig. 1 G–J |     |                 |     |       |     |                 |     |       |     |                 |     | Fig. 4 E and F |     |              |     |
|------------|------------|-----|-----------------|-----|-------|-----|-----------------|-----|-------|-----|-----------------|-----|----------------|-----|--------------|-----|
|            | DS         |     |                 |     | 1-DAI |     |                 |     | 2-DAI |     |                 |     | DS             |     |              |     |
|            | WT         |     | <i>spt-2/12</i> |     | WT    |     | <i>spt-2/12</i> |     | WT    |     | <i>spt-2/12</i> |     | WT             |     | <i>mft-2</i> |     |
|            | Aver       | SD  | Aver            | SD  | Aver  | SD  | Aver            | SD  | Aver  | SD  | Aver            | SD  | Aver           | SD  | Aver         | SD  |
| <b>ABA</b> |            |     |                 |     |       |     |                 |     |       |     |                 |     |                |     |              |     |
| Ler        | 19.5       | 1.0 | 31.4            | 3.2 | 3.5   | 0.4 | 7.2             | 0.9 | 4.0   | 1.4 | 9.2             | 0.9 | 23.0           | 1.5 | 44.8         | 9.0 |
| Col        | 31.4       | 7.5 | 22.0            | 2.9 | 22.2  | 5.4 | 11.4            | 3.8 | 16.4  | 6.9 | 7.5             | 3.4 | 29.1           | 4.7 | 64.6         | 5.3 |
| <b>GA</b>  |            |     |                 |     |       |     |                 |     |       |     |                 |     |                |     |              |     |
| Ler        | 13.8       | 1.5 | 5.4             | 0.9 | 2.7   | 0.7 | 2.3             | 0.5 | 2.6   | 0.8 | 2.8             | 1.1 | 9.5            | 0.8 | 10.9         | 3.2 |
| Col        | 7.8        | 1.2 | 9.9             | 1.9 | 4.1   | 0.7 | 4.0             | 0.7 | 3.4   | 0.4 | 3.1             | 0.5 | 9.8            | 1.5 | 14.1         | 1.1 |

These data were used to calculate relative levels in Figs. 1 G–J and 4 E and F (Aver, average; DAI, day-after-imbibition; DS, dry-seed; DW, dry weight). WT and mutant plants of the same ecotype were grown in parallel, but plants of different ecotypes were not. Our experience of measuring endogenous ABA and GA amounts has indicated that even small changes in environmental conditions (such as variation in temperatures or day-length in the glasshouse) lead to differences in phytohormone levels. For this reason we show relative ABA and GA levels in Fig. 1 G–J and 4 E and F, and we avoid making direct comparisons between ecotypes. The ABA/GA ratios are higher in Col compared with Ler in both datasets. We have observed the same trend in multiple experiments in our laboratory and these results suggest different phytohormone sensitivity of the two ecotypes.

**Table S2. Position of G-box and E-box motifs**

| Gene name        | G-Box                                | E-Box                                        |
|------------------|--------------------------------------|----------------------------------------------|
| <i>ABA1</i>      | None                                 | -1,256; -1,218; -678; -539; -163; -141       |
| <i>ABI4</i>      | None                                 | -2,104; -1,845; -1,654; -1,490; -1,067; -681 |
| <i>ABI5</i>      | -1,681; -1,205; -1,159; -1,148; -343 | Not determined                               |
| <i>RGA</i>       | -1,874; -1,785; -1,772               | Not determined                               |
| <i>RGL3</i>      | None                                 | -970; -745; -424; -185                       |
| <i>MFT</i>       | -1,592; -1,548; -705                 | Not determined                               |
| <i>GA3OX1</i>    | -1,730                               | Not determined                               |
| <i>GA3OX2</i>    | -1,288                               | Not determined                               |
| <i>At2g34020</i> | -1,263                               | Not determined                               |
| <i>At4g39950</i> | -2,051                               | Not determined                               |
| <i>At3g48460</i> | -2,366                               | Not determined                               |
| <i>At5g07190</i> | -1,599                               | Not determined                               |
| <i>At4g33980</i> | -876; -181                           | Not determined                               |

The indicated positions within the promoter region of candidate genes are relative to the ATG start codon of each gene.

**Table S3. Transcriptomic analyses of *spt* mutants**

| Locus            | Description                                | SPToe      | WT          | <i>spt-2</i> | <i>aba1-1</i> | <i>spt-2 aba1-1</i> | G-box |
|------------------|--------------------------------------------|------------|-------------|--------------|---------------|---------------------|-------|
| <i>At2g34020</i> | Similar to calcium ion binding             | 942 ± 43   | 254 ± 87    | 28 ± 2       | 2897 ± 669    | 1072 ± 41           | 1     |
| <i>At4g39950</i> | CYP79B2                                    | 1731 ± 276 | 371 ± 395   | 63 ± 24      | 4964 ± 947    | 2257 ± 205          | 1     |
| <i>At3g48460</i> | GDSL-motif lipase/hydrolase family protein | 1259 ± 76  | 230 ± 225   | 71 ± 13      | 5780 ± 180    | 2680 ± 202          | 1     |
| <i>At2g18050</i> | HIS1-3 (HISTONE H1-3)                      | 461 ± 207  | 1720 ± 938  | 4541 ± 781   | 23 ± 8        | 163 ± 29            | 0     |
| <i>At1g68240</i> | bHLH transcription factor                  | 845 ± 489  | 1849 ± 759  | 5314 ± 551   | 47 ± 28       | 287 ± 62            | 0     |
| <i>At1g18100</i> | MOTHER OF FT AND TFL1 (MFT)                | 507 ± 72   | 1463 ± 323  | 3493 ± 706   | 38 ± 4        | 150 ± 43            | 3     |
| <i>At5g07190</i> | ARABIDOPSIS THALIANA SEED GENE 3           | 819 ± 351  | 2158 ± 1315 | 5288 ± 383   | 42 ± 3        | 163 ± 30            | 1     |
| <i>At5g25180</i> | CYP71B14                                   | 381 ± 159  | 1498 ± 449  | 3478 ± 689   | 28 ± 5        | 87 ± 9              | 0     |
| <i>At4g15620</i> | Integral membrane family protein           | 707 ± 68   | 2374 ± 944  | 4841 ± 349   | 70 ± 20       | 297 ± 88            | 0     |
| <i>At4g33980</i> | Unknown protein                            | 736 ± 82   | 1860 ± 949  | 3620 ± 835   | 85 ± 31       | 311 ± 95            | 2     |

Transcriptomic assays were performed on SPToe, WT, *spt-2*, *aba1-1* and *spt-2 aba1-1* double mutant backgrounds of seeds (*Ler*) which were freshly matured, stratified and sampled 1 d-after-imbibition in continuous light. Genes shown in the table passed significance tests (false-discovery rate < 0.05) of multiple comparisons: SPToe vs. WT; WT vs. *spt-2*; and *aba1-1* vs. *spt-2 aba1-1*. Values were MAS5 normalized. SD of three independent experiments are shown. The final column of the table indicates the number of G-boxes found in the promoter region (2,500 base pair) of each gene. To aid visualization dark and light shading indicate higher and lower expression than WT, respectively.

**Table S4. Sequence of primers used in this study for RT-qPCR and ChIP-qPCR**

| Oligo name       | Sequence (5'→3')           |
|------------------|----------------------------|
| <b>RT-qPCR</b>   |                            |
| ACT2-For (LH39)  | TGAGAGATTCAGATGCCCA        |
| ACT2-Rev (LH40)  | TGGATTCCAGCAGCTTCCAT       |
| ABAI-For         | ATGGCTTGAATTATGGCTTC       |
| ABAI-Rev         | TCATCGCTTTGTCACTGAG        |
| GA3OX1-For       | AAGTGGACCCTAAAGACGATCT     |
| GA3OX1-Rev       | GTCGATGAGAGGGATGTTTTAC     |
| GA3OX2-For       | TGAGTTCCTCACCGGAAGTCTT     |
| GA3OX2-Rev       | CGAGCCGCCTTGAGCTT          |
| ABI3-For         | TCCATTAGACAGCAGTCAAGGTTT   |
| ABI3-Rev         | GGTGTCAAAGAACTCGTTGCTATC   |
| ABI4-For         | TCCCGCTCAACGCAAACG         |
| ABI4-Rev         | TTGTGCAACGCCACGGTA         |
| ABI5-For         | CAATAAGAGAGGGATAGCGAACGAG  |
| ABI5-Rev         | CGTCCATTGCTGTCTCTCCA       |
| GAI-For          | TGCGGCTGCACATATTGG         |
| GAI-Rev          | CCCTCACGCCGTTGA            |
| RGA-For          | CAAGGTTATCGTGTGGAGGAGAGT   |
| RGA-Rev          | GGTGGTAATGAGTGGACGAGTGT    |
| RGL2-For         | CCGACCCGAATCTGAAACCTTAGTG  |
| RGL2-Rev         | AAGCGCTTCGTTGAACCTATCGAG   |
| RGL3-For         | CAAACGAAACCTCTAATCGCTGCAT  |
| RGL3-Rev         | GGGCGAAATTGTCACAAAACGAAAC  |
| DOGI-For         | AACCATCGACGGTACGAATC       |
| DOGI-Rev         | GCTTGTGAGAGCTTGATCC        |
| <b>ChIP-qPCR</b> |                            |
| MFT-For          | ATCACTAACGGCTGCGAGAT       |
| MFT-Rev          | CGGGAATATCCACGACAATC       |
| MLS-For (VA86)   | TGGATTGAACCCAAAACAGTG      |
| MLS-Rev (VA87)   | TCCAATACCTCTGGCTCTGC       |
| ABAI-A-For       | GGATCAATGTTTCATGAGCAA      |
| ABAI-A-Rev       | AGACCTTCCACTTCTCCGTCT      |
| ABAI-B-For       | TTTCTGGATCCCTACTCTTTATGT   |
| ABAI-B-Rev       | TCATCATCATAAAAATCAAATGGTC  |
| ABAI-C-For       | GAAGTGTGTTGCGTTGCTG        |
| ABAI-C-Rev       | CAAAACGGAGTTGAACCA         |
| GA3OX1-A-For     | CAAACGATCAATCGTCTACTTTGC   |
| GA3OX1-A-Rev     | CACCAACGTTCCCTAAGATTTTCA   |
| GA3OX2-A-For     | GTGAAGAAGAAGAAGAACACGCTG   |
| GA3OX2-A-Rev     | GAGCCAAGCCTTATACCGTTAC     |
| PIL2-3-For       | CTAATACTGCATACGGGTACCC     |
| PIL2-3-Rev       | GTGTTGGGAGGAGAGAGAGAGAGAG  |
| ABI4-A-For       | GCAATGGATCTGCAACACTC       |
| ABI4-A-Rev       | AGGGATCGGAGGAAAAACAT       |
| ABI4-B-For       | AGGGTGTGGTAATGGTAGATT      |
| ABI4-B-Rev       | GGGGGCTGATTAGCCATAA        |
| ABI4-C-For       | TGCTTGCCAACTTTAAACGA       |
| ABI4-C-Rev       | AAGAGAAATAAGCGTGTCAA       |
| ABI5-A-For       | TTAGGTCGCTGTTGATTCC        |
| ABI5-A-Rev       | CATGATTCCGAACCTCCATTG      |
| ABI5-B-For       | TGTGTAGCCGAAGTACACACGCTG   |
| ABI5-B-Rev       | CTTTCGACCAATGGAATGCT       |
| ABI5-C-For       | CGATGTGGACCGTTCTCTT        |
| ABI5-C-Rev       | TCCCTGTTCAGCTATTCACG       |
| RGA-A-For        | CAGACTCGGTCCCTACCGTTT      |
| RGA-A-Rev        | GCCGTCATTAACGGCCTCTTTCT    |
| RGA-B-For        | TATGTTTTGATGGCTGAGC        |
| RGA-B-Rev        | GATGGAAGAACTGAAGATGCT      |
| RGA-C-For        | TTCTGGTATGAATGATGATTGAA    |
| RGA-C-Rev        | CAGCTATGAGTTTCGATTAGATTAGG |
| RGL3-A-For       | CCGGCCATTAATAGTCTCG        |
| RGL3-A-Rev       | TGGCTTATTATTTCCGTTTT       |

**Table S4. Cont.**

| Oligo name      | Sequence (5'→3')         |
|-----------------|--------------------------|
| RGL3-B-For      | GAAAGCAACGTAATGTTGTAGACG |
| RGL3-B-Rev      | AATTTGTTTGCCGAAATGGT     |
| RGL3-C-For      | AAAACGGGCTGTTACTTTTCG    |
| RGL3-C-Rev      | CGCTCTGATAAGGGCGTGT      |
| MFT-A-For       | CCAATCGATCGAGTACCACA     |
| MFT-A-Rev       | GCCATTTGAAACTCCTTTGC     |
| MFT-B-For       | CGACCGACCATAAATCATACG    |
| MFT-B-Rev       | CACGTGTTGCATGATTAGCC     |
| MFT-C-For       | AGGAAATTATCGCCAACGTG     |
| MFT-C-Rev       | TTTTGTTTTGTCGCATGTCC     |
| At2g34020-A-For | GAACACGTGGTTTTTCGCATA    |
| At2g34020-A-Rev | ATGCTGCAGGATCACATCAA     |
| At4g39950-A-For | GGGTTTTACGTAGTCGTGTCA    |
| At4g39950-A-Rev | CAGAGGGGATTGGTTTGTAA     |
| At3g48460-A-For | TGAGACCTCTCCCTTTGACG     |
| At3g48460-A-Rev | TGGTCGGTTACATTTTGCTG     |
| At5g07190-A-For | GCCACATACGTAACATTTCG     |
| At5gD719D-A-Rev | CACGTGGATCCGGTAAAATC     |
| At4g33980-A-For | CCATGGTTTGTACCATCTGC     |
| At4g33980-A-Rev | CTGAAGATGCGGTCTCAACA     |
| At4g33980-B-For | AACCTCCCTTCTTCTCTTGAGC   |
| At4g33980-B-Rev | TTCTTCTTCGAAAGAGCCAAA    |
